# Supplementary material for: Heteronuclear and Homonuclear Radio Frequency Driven Recoupling
Source: Copernicus journal article supplement (doi:10.5194/mr-2021-31), 2021-03-29
Supplement: Supplementary file [file mr-2021-31-AC2-supplement.pdf]

We are extremely grateful to the reviewer for her/his positive comments, the time and effort in reviewing the manuscript.

This is an interesting and potentially important manuscript, demonstrating the utility of simultaneous RFDR pi pulse trains on <sup>15</sup>N and <sup>1</sup>H as a means of transferring polarization from <sup>15</sup>N to <sup>1</sup>H and also transferring polarization among <sup>1</sup>H spins. The authors show that long-range <sup>1</sup>H-<sup>1</sup>H transfers are observed, which provide useful structural information. With numerical simulations, they explore dependences on resonance offsets that are important especially at lower MAS frequencies.

This paper is certainly suitable for publication in MR. My only recommendation is that the authors re-examine their choice of references in the Introduction. It is worth noting that the first examples of homonuclear dipolar recoupling (by Meier and Earl for <sup>1</sup>H-<sup>1</sup>H couplings and by Tycko and Dabbagh for <sup>13</sup>C-<sup>13</sup>C couplings and quantitative distance measurements) are not cited.

We apologize for the missing articles. We included the articles of Meier and Earl, (1986) and Tycko and Dabbagh, (1990) into citation.

The Ok paper is not about RFDR.

We corrected the wrong citation on line 41, page 2. It should be the article of Bennett et al., (1992).

What is now called RFDR was originally introduced by Gullion and Vega (and called SEDRA). The 2001 paper by Ishii analyzed finite-pulse effects in detail and showed that XY4 phase cycling produces an average homonuclear dipole-dipole Hamiltonian with the same operator form as in a non-spinning sample.

We added the following sentence and the citation about the article of Gullion and Vega:

*“The recoupling of the homonuclear dipolar interactions with a train of  $\pi$ -pulses every rotor period was originally introduced by Gullion and Vega (Gullion and Vega, 1992) and Bennett et al (Bennett et al., 1992b).”*

Bennett, A. E., Griffin, R. G., Ok, J. H., and Vega, S.: Chemical shift correlation spectroscopy in rotating solids: Radio frequency-driven dipolar recoupling and longitudinal exchange, *J. Chem. Phys.*, 96, 8624–8627, <https://doi.org/10.1063/1.462267>, 1992.

Gullion, T. and Vega, S.: A simple magic angle spinning NMR experiment for the dephasing of rotational echoes of dipolar coupled homonuclear spin pairs, *Chem. Phys. Lett.*, 194, 423–428, [https://doi.org/10.1016/0009-2614\(92\)86076-T](https://doi.org/10.1016/0009-2614(92)86076-T), 1992.

Meier, B. H. and Earl, W. L.: Excitation of multiple quantum transitions under magic angle spinning conditions: Adamantane, *J. Chem. Phys.*, 85, 4905–4911, <https://doi.org/10.1063/1.451726>, 1986.

Tycko, R. and Dabbagh, G.: Measurement of nuclear magnetic dipole–dipole couplings in magic angle spinning NMR, *Chem. Phys. Lett.*, 173, 461–465, [https://doi.org/10.1016/0009-2614\(90\)87235-J](https://doi.org/10.1016/0009-2614(90)87235-J), 1990.
